# Supplementary material for: Carbohydrate Intake and Closed-Loop Insulin Delivery System during Two Subsequent Pregnancies in Type 1 Diabetes
Source: MDPI journal article supplement (doi:10.3390/metabo12111137), 2022-11-18
Supplement: s1 [file s1]

**Supplementary Table S1.** Associations between number of meals and daily carbs with glycemic parameters for the first pregnancy (on SAP), described by the Pearson r correlation coefficient.

|                                             | Number of meals               |                  |                 | Daily carbs                  |                  |                 |
|---------------------------------------------|-------------------------------|------------------|-----------------|------------------------------|------------------|-----------------|
|                                             | First trimester               | Second trimester | Third trimester | First trimester              | Second trimester | Third trimester |
|                                             | r<br>p                        | r<br>p           | r<br>p          | r<br>p                       | r<br>p           | r<br>p          |
| Daily carbohydrates, g                      | 0.527<br>0.473                | 0.351<br>0.495   | 0.230<br>0.661  | /                            | /                | /               |
| Mean SG, mmol/l                             | -0.149<br>0.851               | -0.238<br>0.700  | 0.079<br>0.882  | -0.800<br>0.200              | 0.191<br>0.758   | -0.187<br>0.722 |
| TIR, %                                      | 0.925<br>0.075                | 0.405<br>0.499   | 0.260<br>0.619  | <b>0.807</b><br><b>0.193</b> | -0.042<br>0.946  | -0.245<br>0.640 |
| TBR, %                                      | -0.718<br>0.282               | 0.578<br>0.307   | -0.181<br>0.732 | 0.015<br>0.985               | 0.592<br>0.293   | 0.381<br>0.457  |
| TAR, %                                      | -0.579<br>0.421               | -0.687<br>0.200  | -0.227<br>0.666 | -0.948<br>0.052              | -0.188<br>0.762  | -0.010<br>0.985 |
| GMI, mmol/mol                               | -0.515<br>0.584               | -0.238<br>0.700  | 0.079<br>0.882  | -0.013<br>0.987              | 0.191<br>0.758   | -0.187<br>0.722 |
| CV, %                                       | -0.557<br>0.443               | 0.101<br>0.872   | -0.692<br>0.128 | 0.344<br>0.656               | 0.673<br>0.213   | 0.035<br>0.948  |
| HbA1c, %                                    | -0.323<br>0.677               | -0.624<br>0.186  | 0.577<br>0.230  | 0.052<br>0.948               | -0.354<br>0.491  | 0.116<br>0.827  |
| Total insulin (IU)                          | -0.856<br>0.144               | -0.159<br>0.765  | -0.206<br>0.695 | -0.014<br>0.986              | 0.710<br>0.114   | 0.709<br>0.115  |
| Total insulin per body weight (IU/kg)       | <b>-0.975</b><br><b>0.025</b> | -0.020<br>0.970  | -0.044<br>0.934 | -0.329<br>0.671              | 0.665<br>0.149   | 0.654<br>0.159  |
| Total bolus insulin (IU)                    | -0.786<br>0.214               | -0.184<br>0.727  | -0.237<br>0.650 | 0.055<br>0.945               | 0.764<br>0.077   | 0.694<br>0.159  |
| Total bolus insulin per body weight (IU/kg) | -0.926<br>0.074               | -0.117<br>0.826  | -0.166<br>0.753 | -0.237<br>0.763              | 0.779<br>0.068   | 0.666<br>0.149  |
| Daily bolus insulin, %                      | 0.263<br>0.737                | -0.320<br>0.536  | -0.465<br>0.352 | 0.233<br>0.767               | 0.629<br>0.181   | 0.640<br>0.171  |
| Total basal insulin (IU)                    | -0.875<br>0.065               | -0.087<br>0.870  | -0.086<br>0.871 | -0.092<br>0.908              | 0.521<br>0.290   | 0.756<br>0.082  |
| Total basal insulin per body weight (IU/kg) | -0.935<br>0.065               | 0.174<br>0.741   | 0.436<br>0.387  | -0.391<br>0.609              | 0.231<br>0.660   | 0.446<br>0.375  |
| Daily basal insulin, %                      | -0.263<br>0.737               | 0.320<br>0.536   | 0.465<br>0.352  | -0.233<br>0.767              | -0.629<br>0.181  | -0.640<br>0.171 |
| Sensor time, %                              | 0.233<br>0.767                | 0.777<br>0.122   | 0.450<br>0.370  | 0.948<br>0.052               | 0.434<br>0.466   | 0.252<br>0.630  |

SG-sensor glucose concentration, GMI-glucose management indicator, CV-coefficient of variation, HbA<sub>1c</sub>-glycated hemoglobin; TBR–time below range (glucose concentration <3.5 mmol/l), TAR – time above range (glucose concentration >7.8 mmol/l)

**Supplementary Table S2.** Self-reported physical activity during the first and the second pregnancy

|                 | <b>First pregnancy</b> | <b>Second pregnancy</b> | <b>p value</b> |
|-----------------|------------------------|-------------------------|----------------|
| Frequency of PA | 2.5±1.4                | 3.3±1.5                 | 0.289          |
| Time of PA      | 2.0±0.6                | 1.8±0.8                 | 0.611          |
| Intensity of PA | 2±0.0                  | 2.0±0.7                 | 1.000          |

PA-physical activity

Frequency of PA: from 1- twice per week or less to 5-multiple times per day.

Time of PA: 1-30 minutes or less, 2-between 30 and 60 minutes, 3-60 minutes or more.

Intensity of PA: 1-low, 2-moderate, 3-high
